# Supplementary material
Source: PubMed Central journal article supplement (PMC6169190)
Supplement: tpmd170537.SD3.pdf [file tpmd170537.SD3.pdf]

**Supplemental Table 1: IRS and ITN cost categories**

| Category                                              | Components                                                                 | Notes                                                                                                                                                     |
|-------------------------------------------------------|----------------------------------------------------------------------------|-----------------------------------------------------------------------------------------------------------------------------------------------------------|
| <b>IRS</b>                                            |                                                                            |                                                                                                                                                           |
| Spray operations                                      | Planning and logistics assessment activities                               |                                                                                                                                                           |
|                                                       | Environmental compliance                                                   | Includes soak pit construction, waste storage, and waste disposal                                                                                         |
|                                                       | Training of spray operators                                                |                                                                                                                                                           |
|                                                       | Information, education, and communication (IEC) and community mobilization |                                                                                                                                                           |
|                                                       | Warehousing                                                                |                                                                                                                                                           |
|                                                       | Short-term labor                                                           | Includes only seasonal labor directly tied to the spraying itself (e.g. spray operators, IEC mobilizers, field supervisors, and data entry clerks)        |
|                                                       | Transportation                                                             | Includes only transportation directly tied to the spraying itself (i.e. transporting spray operators between villages)                                    |
|                                                       | Other spray costs                                                          | Includes medical costs (pregnancy tests for spray operators, first aid), mop-up operations, post-spray meetings, and monitoring and evaluation activities |
| Spray operations commodities                          | Insecticide                                                                |                                                                                                                                                           |
|                                                       | Spray equipment and equipment repair kits                                  |                                                                                                                                                           |
|                                                       | Personal protective equipment (PPE)                                        |                                                                                                                                                           |
|                                                       | Shipping                                                                   |                                                                                                                                                           |
| Local administration                                  | Office leases, utilities, and maintenance                                  |                                                                                                                                                           |
|                                                       | Office furniture, equipment, and supplies                                  |                                                                                                                                                           |
|                                                       | Communication                                                              |                                                                                                                                                           |
|                                                       | Travel and transportation                                                  | Includes all transportation not directly tied to spray operations                                                                                         |
|                                                       | Local labor                                                                | Includes all long-term staff based in Tanzania employed by RTI International, as distinct from short-term staff hired only for spray operations           |
|                                                       | Other local administration costs                                           |                                                                                                                                                           |
| In-kind contributions                                 | Government warehouse space                                                 |                                                                                                                                                           |
|                                                       | Government office space                                                    |                                                                                                                                                           |
|                                                       | Government vehicles                                                        |                                                                                                                                                           |
|                                                       | Fuel for government vehicles                                               |                                                                                                                                                           |
|                                                       | Government labor costs                                                     |                                                                                                                                                           |
|                                                       | Water usage at households                                                  | Used to hydrate insecticide sachets during spray operations                                                                                               |
| Short-term technical assistance; US and Nairobi costs | U.S.- and Nairobi-based support services                                   | Not included in analysis                                                                                                                                  |
| <b>ITNs</b>                                           |                                                                            |                                                                                                                                                           |
| Net distribution operations                           | Planning and logistics assessment activities                               |                                                                                                                                                           |

|                              |                                           |                                                                                                                                                  |
|------------------------------|-------------------------------------------|--------------------------------------------------------------------------------------------------------------------------------------------------|
|                              | Training distributors                     |                                                                                                                                                  |
|                              | IEC and community mobilization            |                                                                                                                                                  |
|                              | Warehousing                               | Includes storage of nets                                                                                                                         |
|                              | Short-term labor                          | Includes only labor tied directly to the distribution of nets; if net distributors were volunteers, includes an economic valuation of their time |
|                              | Transportation                            | Includes only transportation directly tied to the transportation of nets                                                                         |
| Net distribution commodities | Nets                                      | Long-lasting insecticidal nets come impregnated with insecticide, so costs of insecticides are included in the costs of the net                  |
|                              | Voucher production                        | Only recorded if a voucher-based distribution scheme                                                                                             |
| Local administration         | Office leases, utilities, and maintenance | Includes recurrent costs associated with running an office, less labor costs                                                                     |
|                              | Office furniture, equipment, and supplies | Includes capital costs associated with running an office                                                                                         |
|                              | Local labor                               | Includes all long-term local staff, as distinct from short-term staff or volunteers hired only for net distribution and related activities       |

**Supplemental Table 2: Cost of illness components**

| Category            | Components               | Notes                                                                                                                                                                        |
|---------------------|--------------------------|------------------------------------------------------------------------------------------------------------------------------------------------------------------------------|
| Household costs     | Direct household costs   | Includes costs of traveling to clinic, costs of hospitalization, costs of treatment, and user fees                                                                           |
|                     | Indirect household costs | Includes caregivers' reported loss of productivity during the entire malaria episode                                                                                         |
| Health system costs | Recurrent costs          | Includes drugs and personnel                                                                                                                                                 |
|                     | Capital costs            | Includes equipment and building space                                                                                                                                        |
|                     | Costs of complications   | Includes blood transfusions for severe anemia, anti-seizure/anticonvulsant therapies for cerebral malaria, and rehabilitation costs post-discharge for neurological sequelae |

**Supplemental Table 3: Descriptions and sources of probability estimates**

| Parameter                                                | Baseline                                                                                   | Minimum*                                        | Maximum*                                        | Notes and assumptions                          |
|----------------------------------------------------------|--------------------------------------------------------------------------------------------|-------------------------------------------------|-------------------------------------------------|------------------------------------------------|
| Probability of receiving IRS in the dwelling             | Mean reported IRS coverage rates from RTI-supported campaigns in Tanzania <sup>4,8</sup>   | Minimum reported coverage rates <sup>4,8</sup>  | Maximum reported coverage rates <sup>4,8</sup>  | Treated as independent from ITN usage rates    |
| Probability of using an ITN                              | Mainland usage rate from most recent Tanzania malaria indicator survey (MIS) <sup>26</sup> | Minimum regional usage rate <sup>26</sup>       | Maximum regional usage rate <sup>26</sup>       | Treated as independent from IRS coverage rates |
| Probability of infection with malaria parasite, given no | Mainland prevalence of parasitemia from most recent MIS <sup>26</sup>                      | Minimum prevalence of parasitemia <sup>26</sup> | Maximum prevalence of parasitemia <sup>26</sup> |                                                |

|                                                             |                                                                                           |                                                                            |                                                                                               |                                                                                                                                                                       |
|-------------------------------------------------------------|-------------------------------------------------------------------------------------------|----------------------------------------------------------------------------|-----------------------------------------------------------------------------------------------|-----------------------------------------------------------------------------------------------------------------------------------------------------------------------|
| intervention                                                |                                                                                           |                                                                            |                                                                                               |                                                                                                                                                                       |
| Reduction of prevalence odds from ITNs, IRS, or combination | Point estimate from study of MIS data from 17 sub-Saharan African countries <sup>32</sup> | Lower 95% confidence limit of estimate <sup>32</sup>                       | Upper 95% confidence limit of estimate <sup>32</sup>                                          | Reflects a parasite rate of $PfPR_{2-10}$ between 5% and 40%; 95% CI completely contains 95% CI of estimate for $PfPR_{2-10}$ between 0% and 5%                       |
| Probability of developing symptoms if infected              | Estimate from follow-up study in Uganda <sup>41</sup>                                     | Estimate calculated from cross-sectional study in Mozambique <sup>42</sup> | Estimate from follow-up study in Dar es Salaam and from personal communications <sup>43</sup> |                                                                                                                                                                       |
| Probability of seeking formal treatment                     | Mainland treatment-seeking rate from most recent MIS <sup>26</sup>                        | Minimum regional treatment-seeking rate <sup>26</sup>                      | Maximum regional treatment-seeking rate <sup>26</sup>                                         |                                                                                                                                                                       |
| Probability of treatment failure                            | Failure rate using artemether-lumefantrine (ALu) in Mainland Tanzania <sup>44</sup>       | Perfectly effective treatment using ALu <sup>45</sup>                      | Failure rate using monotherapy of amodiaquine <sup>45</sup>                                   | Relapse of same malaria infection confirmed by polymerase chain reaction (PCR) test within 28 days of start of treatment; assume relapse will be treated successfully |
| Probability of developing complicated malaria               | Point estimate from follow-up study of children aged 1-4 years in Tanzania <sup>46</sup>  | Lower 95% confidence limit of estimate <sup>46</sup>                       | Upper 95% confidence limit of estimate <sup>46</sup>                                          | Assumed to be independent from prior treatment                                                                                                                        |

\* See Table 4 for values

**Supplemental Table 4: Input values for best- and worst-case scenario analyses**

| Label                                                                               | Best Case | Worst Case |
|-------------------------------------------------------------------------------------|-----------|------------|
| Number of IRS rounds required                                                       | 1         | 2          |
| Cost of insecticide for IRS per person protected                                    | \$0.34    | \$0.84     |
| Cost of administration/other staff labor (not net distribution) per net distributed | \$0.04    | \$12.65    |
| Cost of IEC for ITNs per net distributed                                            | \$0.04    | \$2.16     |
| Cost of ITN distributors' labor per net distributed                                 | \$0.01    | \$1.95     |
| Number of people covered by a single net                                            | 3         | 1          |
| Unit cost of a net                                                                  | \$2.50    | \$4.80     |
| Probability of correctly using an ITN                                               | 0.889     | 0.587      |
| Probability of developing malaria given no treatment                                | 1.000     | 0.117      |
| Probability of parasitemia given no intervention                                    | 0.318     | 0.050      |

**Supplemental Table 5: Input values for targeted spraying scenario analysis**

| <b>Label</b>                                       | <b>Scenario Value</b> | <b>Notes</b>                                                                              |
|----------------------------------------------------|-----------------------|-------------------------------------------------------------------------------------------|
| Number of IRS rounds required                      | 1                     | Assume only target each house once per year                                               |
| Probability of parasitemia, given no intervention  | 0.318                 | Assume focus only on regions with high prevalence of malaria; maximum regional prevalence |
| Probability receive IRS in dwelling                | 0.850                 | Reflects TVCSP target for IRS                                                             |
| Risk reduction of parasitemia with IRS use         | 0.030                 | Assume loss of efficacy due to lack of spillover effect; minimum risk reduction           |
| Risk reduction of parasitemia with IRS and ITN use | 0.370                 | Assume loss of efficacy due to lack of spillover effect; minimum risk reduction           |

**Supplemental Table 6: Input values for increased pyrethroid resistance scenario analysis**

| <b>Label</b>                                       | <b>Scenario Value</b> | <b>Notes</b>                                 |
|----------------------------------------------------|-----------------------|----------------------------------------------|
| Risk reduction of parasitemia with ITN use         | 0.030                 | Assume loss of ITN efficacy to minimum level |
| Risk reduction of parasitemia with IRS and ITN use | 0.370                 | Assume loss of ITN efficacy to minimum level |
| Cost of insecticide for IRS, per person protected  | \$0.64                | Reflects 2012 costs of bendiocarb            |
